# Supplementary material for: Significant effect of alkyl chain length on fluorescent thermochromism of 9,10-bis(p-alkoxystyryl)anthracenes
Source: Royal Society of Chemistry journal article supplement (doi:10.1039/c5ra08809g), 2015-01-01
Supplement: c5ra08809g1.pdf [file c5ra08809g1.pdf]

**Supporting Information for**  
**Significant effect of alkyl chain length on fluorescent**  
**thermochromism of 9,10-bis(*p*-alkoxystyryl)anthracenes**

Yao Xiong, <sup>a, b</sup> Yawen Ma, <sup>a, b</sup> Xilong Yan, <sup>a, b</sup> Guohui Yin\*<sup>c</sup> and Ligong Chen\*<sup>a, b</sup>

<sup>a</sup> School of Chemical Engineering and Technology, Tianjin University, Tianjin  
300072, People's Republic of China

<sup>b</sup> Collaborative Innovation Center of Chemical Science and Engineering (Tianjin),  
Tianjin 300072, P.R. China

<sup>c</sup> School of Science, Tianjin University, Tianjin 300072, P. R. China  
yingh21@aliyun.com

Corresponding author. Tel.: +86 22 27406314; fax: +86 22 27406314. E-mail address:  
[lgchen@tju.edu.cn](mailto:lgchen@tju.edu.cn)(Lg. Chen)

**Contents**

|                                                                           |            |
|---------------------------------------------------------------------------|------------|
| 1. Experimental section.....                                              | Page 2-4   |
| 2. References.....                                                        | Page 4     |
| 3. Table S1 and Figs. S1-S5.....                                          | Page 5-8   |
| 4. <sup>1</sup> H NMR and <sup>13</sup> C NMR, HRMS spectra and HPLC..... | Page 9-14  |
| 5. Crystallographic data.....                                             | Page 15-16 |

## 1 Experimental section

### Materials and measurements

Anthracene, paraformaldehyde, 4-hydroxybenzaldehyde, *n*-butyl bromide, *n*-octyl bromide and *n*-hexadecyl bromide were purchased from Tianjin Guangfu Fine Chemical Reagents Company (China) and used as received. Other common reagents and solvents were purchased as analytical grade from Tianjin Jiangtian Chemical technology Co., LTD (China) and used without further purification. Tetrahydrofuran (THF) was distilled from sodium/benzophenone before use. Deionized water was employed throughout this study. 9,10-Bis(chloromethyl) anthracene<sup>1</sup> (**1**), 9,10-bis(diethylphosphorylmethyl)anthracene<sup>2</sup> (**2**) and alkoxy-substituted benzaldehydes<sup>3</sup> (**3**, **4** and **5**) were prepared according to the literature methods. 9,10-Bis(*p*-alkoxystyryl)anthracenes (**DSA-pn<sub>n</sub>**, *n* = 4, 8, 16) were successfully synthesized by Wittig–Horner reactions of corresponding alkoxy-substituted benzaldehydes and 9,10-bis(diethoxyphosphorylmethyl)anthracene<sup>4</sup>, described in **Scheme 1**.

NMR spectra were recorded on a Bruker AVANCE III spectrometer (600 MHz for <sup>1</sup>H NMR and 150 MHz for <sup>13</sup>C NMR) with CDCl<sub>3</sub> as solvent and tetramethylsilane (TMS) as the internal standard. High-resolution mass spectra (HRMS) were measured on a Bruker Daltonics micrOTOF-Q II instrument. Photoluminescence spectra (PL) were measured on an Edinburgh FLS920 spectrometer with a slit width of 1.0 nm for both excitation and emission. TGA (thermal gravimetric analysis) was recorded on an STA 409PC with a heating rate of 10 °C /min from room temperature to 800 °C in a stream of N<sub>2</sub> (40 mL/min). Quantitative analysis of **DSA-pn4**, **DSA-pn8** and **DSA-pn16** were conducted on a Baker Norton pharmaceuticals detector with a baseline C<sub>18</sub>-column at 365 nm under 1 mL/min of mobile phase by gradient elution with the ratio (V:V) of methylene chloride and methanol as 80:20, 50:50, 30:70, data was collected and analyzed with N2000 chromatography data system. Differential scanning calorimetry (DSC) curves were obtained with a Perkin Elmer Diamond DSC at heating rate of 10 °C/min under N<sub>2</sub> atmosphere. Wide-angle X-ray diffraction (WAXD) measurements were performed by using a BRUKER X-ray diffractometer (D8 ADVANCE) at a scanning rate of 4°/min. THF aqueous solution of certain concentration was made up by addition of water into the THF solutions of samples under vigorous stirring at room temperature. The concentrations of all samples were adjusted to 1.0 × 10<sup>-5</sup> μM by adding water. Thermochromic experiments: The powder sample placed on a microslide was heated by an electronic hot plate to the color-transition temperature, the fluorescence images under a 365 nm UV lamp were taken immediately. Then the heated sample was exposed in air and naturally cooled to room temperature.

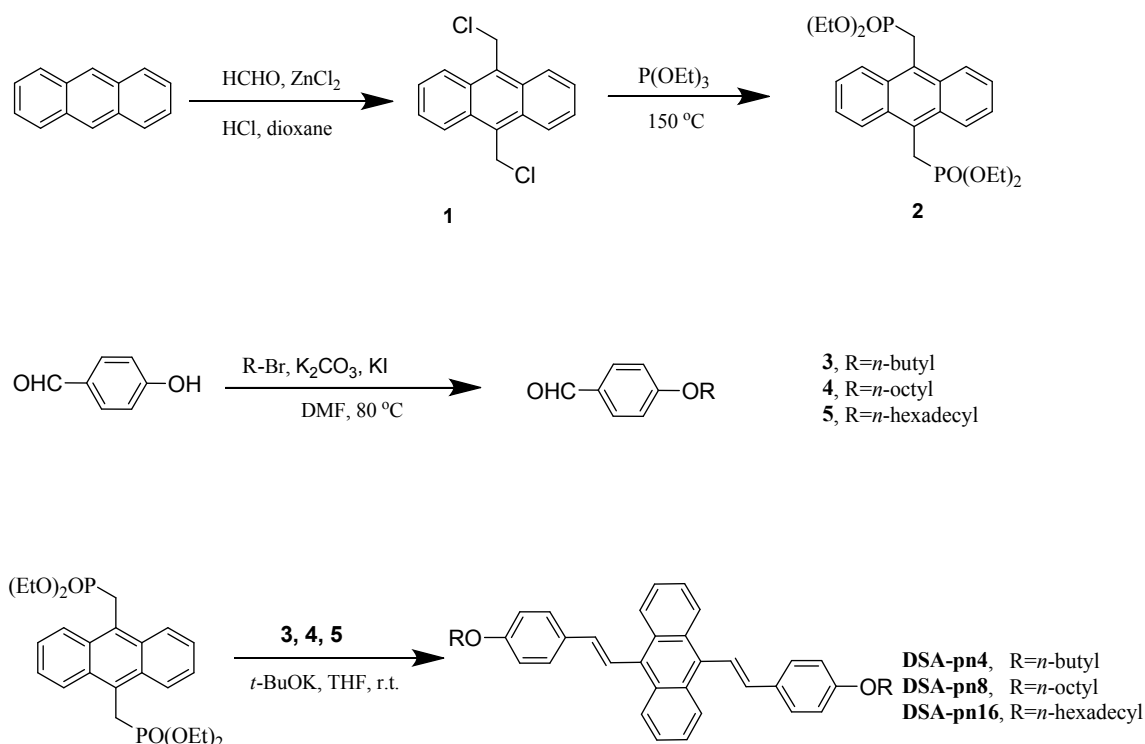

**Scheme 1** Synthesis and structures of **DSA-pn<sub>n</sub>**

### 9,10-Bis(chloromethyl)anthracene (**1**)

To a mixture of anthracene (8.90 g, 50 mmol) and paraformaldehyde (7.50 g, 250 mmol) in dioxane (100 mL) was dropwise added concentrated hydrochloric acid (200 mL) at room temperature under N<sub>2</sub> atmosphere. Then the solution was heated and slowly stirred under gentle reflux for 3 h. After this, the reaction mixture was allowed to stand for 16 h. The crude product was obtained by filtration and washed with 1,4-dioxane and water until pH = 7. Finally, its recrystallization in toluene yields a yellow solid (8.44g, 60% yield). <sup>1</sup>H NMR (600MHz, CDCl<sub>3</sub>, ppm): 8.40-8.38 (m, 4H), 7.67-7.66 (m, 4H), 5.61(s, 4H).

### 9,10-Bis(diethylphosphorylmethyl)anthracene (**2**)

A solution of compound **1** (7.80 g, 28 mmol) in triethyl phosphite (30 ml) was stirred vigorously at gentle reflux for 12 h. After cooling down to room temperature, it was purified by flash chromatography (ethyl acetate/petroleum ether, 1/1, v/v) to give 8.16 g compound **2** as a yellow solid (59% yield). <sup>1</sup>H NMR (600 MHz, CDCl<sub>3</sub>, ppm): 8.38-8.37 (m, 4H), 7.58-7.56 (m, 4H), 4.21 (d, 4H, *J* = 19.8 Hz), 3.91-3.86 (m, 4H), 3.82-3.78(m, 4H), 1.06 (t, 12H, *J* = 7.2 Hz).

### 4-(*n*-Butoxy)benzaldehyde (**3**)

To a solution of 4-hydroxybenzaldehyde (3.00 g, 24 mmol) in dry DMF (30 mL), K<sub>2</sub>CO<sub>3</sub> (3.18 g, 30 mmol) and KI (catalytic amount) were added. The mixture was stirred and heated to 80 °C, followed by slow addition of *n*-butyl bromide (2.4 ml, 27 mmol). The mixture was continually stirred for 8 h at this temperature. After cooling to room temperature, it was poured into brine (50 mL) and extracted with dichloromethane (3×30 mL). The organic phases were combined, washed by NaOH aqueous solutions (10%, 3×30mL) and deionized water (3×30mL). Then the organic

phases were dried over MgSO<sub>4</sub> and concentrated to afford a brownish liquid (3.30 g, 65 %).

4-(*n*-Octyl)benzaldehyde (**4**) and 4-(*n*-hexadecyl)benzaldehyde (**5**) were synthesized by the same method.

#### **9,10-Bis(4-(*n*-butoxy)styryl)anthracenes (DSA-pn4)**

To the solution of compounds **2** (0.60 g, 1.26 mmol) and **3** (0.40 g, 2.76 mmol) in 40 mL of dry THF, potassium *t*-butoxide (0.30 g, 2.76 mmol) was added. The obtained suspension was stirred at room temperature for 8 h. After removing the solvent under reduced pressure, the residue was recrystallized in THF/MeOH (1/10, v/v). The yellow solids were collected by filtration, washed with methanol, then purified by flash chromatography (petroleum ether/methylene chloride, 5/1, v/v) to afford 0.43 g

**DSA-pn4** as a yellow-green solid in 76 % yield. m.p. 214-215 °C. <sup>1</sup>H NMR (600MHz, CDCl<sub>3</sub>) δ (ppm): 8.41-8.40 (m, 4H), 7.78 (d, 2H, *J* = 16.2 Hz), 7.62 (d, 4H, *J* = 8.4 Hz), 7.47-7.45 (m, 4H), 6.99 (d, 4H, *J* = 8.4 Hz), 6.88 (d, 2H, *J* = 16.2 Hz), 4.05 (t, 4H, *J* = 6.6 Hz), 1.85-1.80 (m, 4H), 1.56-1.54 (m, 4H), 1.02 (t, 6H, *J* = 7.2 Hz); <sup>13</sup>C NMR (150MHz, CDCl<sub>3</sub>) δ (ppm): 159.34, 137.06, 132.95, 130.17, 129.79, 127.92, 126.69, 125.22, 122.91, 115.00, 68.01, 31.49, 19.42, 14.02. HRMS (APCI): calcd. for C<sub>38</sub>H<sub>38</sub>O<sub>2</sub>H 527.2945 [M + H]<sup>+</sup>; found 527.2944. Purity: 96.95% (HPLC, *t*<sub>R</sub> = 10.607 min).

**DSA-pn8** and **DSA-pn16** were obtained by the same procedure.

**DSA-pn8**: Yield 67%, m.p. 145-147 °C. <sup>1</sup>H NMR (600MHz, CDCl<sub>3</sub>) δ (ppm): 8.42-8.40 (m, 4H), 7.78 (d, 2H, *J* = 16.8 Hz), 7.62 (d, 4H, *J* = 8.4 Hz), 7.47-7.46 (m, 4H), 6.99 (d, 4H, *J* = 8.4 Hz), 6.88 (d, 2H, *J* = 16.8 Hz), 4.04 (t, 4H, *J* = 6.6 Hz), 1.86-1.82 (m, 4H), 1.52-1.48 (m, 4H), 1.40-1.33 (m, 16H), 0.93 (t, 6H, *J* = 6.6 Hz); <sup>13</sup>C NMR (150MHz, CDCl<sub>3</sub>) δ (ppm): 159.34, 137.06, 132.95, 130.16, 129.79, 127.91, 126.69, 125.21, 122.90, 114.99, 68.34, 31.99, 29.54, 29.44, 29.41, 26.22, 22.83, 14.26.

HRMS (APCI): calcd. for C<sub>46</sub>H<sub>54</sub>O<sub>2</sub>H 639.4197 [M + H]<sup>+</sup>; found 639.4195. Purity: 99.03 % (HPLC, *t*<sub>R</sub> = 12.557 min).

**DSA-pn16**: Yield 65%, m.p. 124-125 °C. <sup>1</sup>H NMR (600MHz, CDCl<sub>3</sub>) δ(ppm): 8.41-8.40 (m, 4H), 7.78 (d, 2H, *J* = 16.2 Hz), 7.61 (d, 4H, *J* = 7.8 Hz), 7.47-7.45 (m, 4H), 6.99 (d, 4H, *J* = 7.8 Hz), 6.87 (d, 2H, *J* = 16.8 Hz), 4.03 (t, 4H, *J* = 6.6 Hz), 1.85-1.81 (m, 4H), 1.39-1.27 (m, 52H), 0.89 (t, 6H, *J* = 6.6 Hz); <sup>13</sup>C NMR (150MHz, CDCl<sub>3</sub>) δ (ppm): 159.22, 136.93, 132.83, 130.03, 129.66, 127.78, 126.56, 125.08, 122.77, 114.87, 68.22, 31.95, 29.72, 29.70, 29.68, 29.64, 29.62, 29.45, 29.38, 29.31, 26.08, 22.71, 14.13.

HRMS (ESI): calcd. for C<sub>62</sub>H<sub>86</sub>O<sub>2</sub>H 863.6701 [M + H]<sup>+</sup>; found 863.6710. Purity: 96.11% (HPLC, *t*<sub>R</sub> = 11.623 min).

## **2 References**

1. W. Liu, *et al. Chem. Commun.*, 2013, **49**, 6042
2. H. Zhang, *et al. Chem. Mater.*, 2009, **21**, 5125.
3. C. Wang, *et al. Chem. Eur. J.*, 2011, **17**, 3322.
4. X. Zhang, *et al. Chem. Commun.*, 2012, **48**, 10895

### 3 Table S1, Figs. S1-S5

**Table S1** Emission wavelength (nm) and intensity of **DSA-pn<sub>n</sub>** from 298 K to 498 K

| Temperature/K | DSA-pn4            |                | DSA-pn8            |                | DSA-pn16           |                |
|---------------|--------------------|----------------|--------------------|----------------|--------------------|----------------|
|               | Peak Wavelength/nm | Peak Intensity | Peak Wavelength/nm | Peak Intensity | Peak Wavelength/nm | Peak Intensity |
| 298           | 520                | 403.8          | 521                | 12210.0        | 505                | 3934.0         |
| 308           | 522                | 386.5          | 522                | 12160.0        | 505                | 3890.0         |
| 318           | 521                | 372.0          | 523                | 11950.0        | 505                | 3852.0         |
| 328           | 521                | 398.6          | 523                | 11800.0        | 506                | 3767.0         |
| 338           | 521                | 411.3          | 522                | 11610.0        | 508                | 3757.0         |
| 348           | 522                | 407.0          | 524                | 11320.0        | 512                | 3627.0         |
| 358           | 521                | 413.0          | 529                | 11420.0        | 515                | 3613.0         |
| 368           | 519                | 405.5          | 527                | 11260.0        | 518                | 3574.0         |
| 378           | 519                | 388.4          | 518                | 10470.0        | 524                | 3360.0         |
| 388           | 515                | 356.4          | 520                | 9012.0         | 528                | 2667.0         |
| 398           | 515                | 324.6          | 517                | 8005.0         | 532                | 1226.0         |
| 408           | 518                | 294.3          | 517                | 7574.0         | 573                | 315.4          |
| 418           | 519                | 278.6          | 519                | 7781.0         | 570                | 271.2          |
| 428           | 520                | 302.4          | 518                | 7829.0         | 576                | 233.6          |
| 438           | 521                | 316.4          | 541                | 5094.0         | 576                | 212.1          |
| 448           | 524                | 303.6          | 562                | 302.5          | 575                | 198.8          |
| 458           | 523                | 288.1          | 568                | 273.6          | 574                | 171.9          |
| 468           | 524                | 269.0          | 568                | 246.0          | 577                | 163.8          |
| 478           | 522                | 255.1          | 569                | 221.4          | 576                | 156.7          |
| 488           | 567                | 33.6           | 569                | 200.2          | 577                | 148.9          |
| 498           | 566                | 20.8           | 569                | 177.7          | 577                | 140.6          |

**Fig. S1** Maximum fluorescence intensity vs temperature of **DSA-pn<sub>n</sub>** upon heating

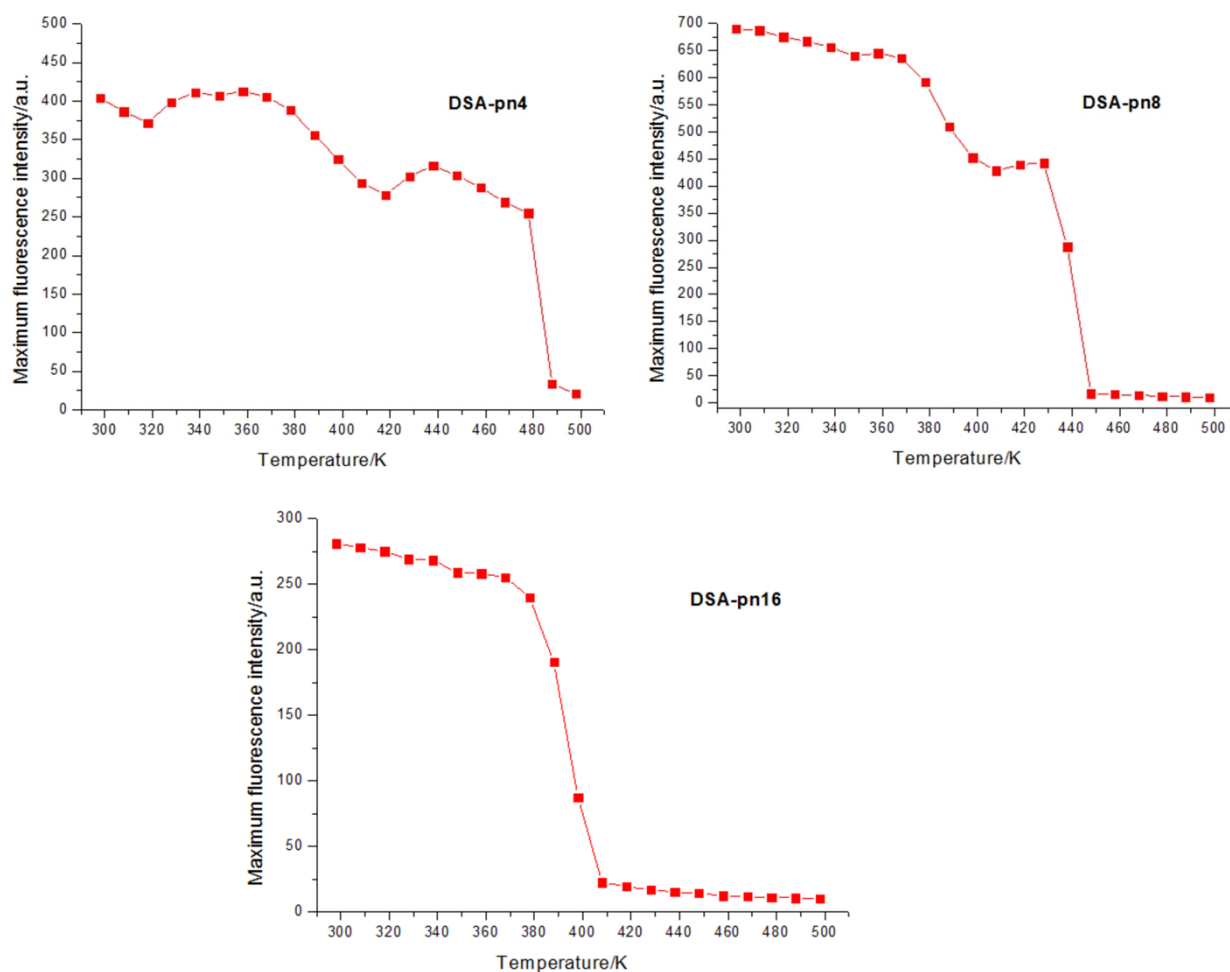

**Fig. S2** DSC curves of **DSA-pn<sub>n</sub>** pristine solids

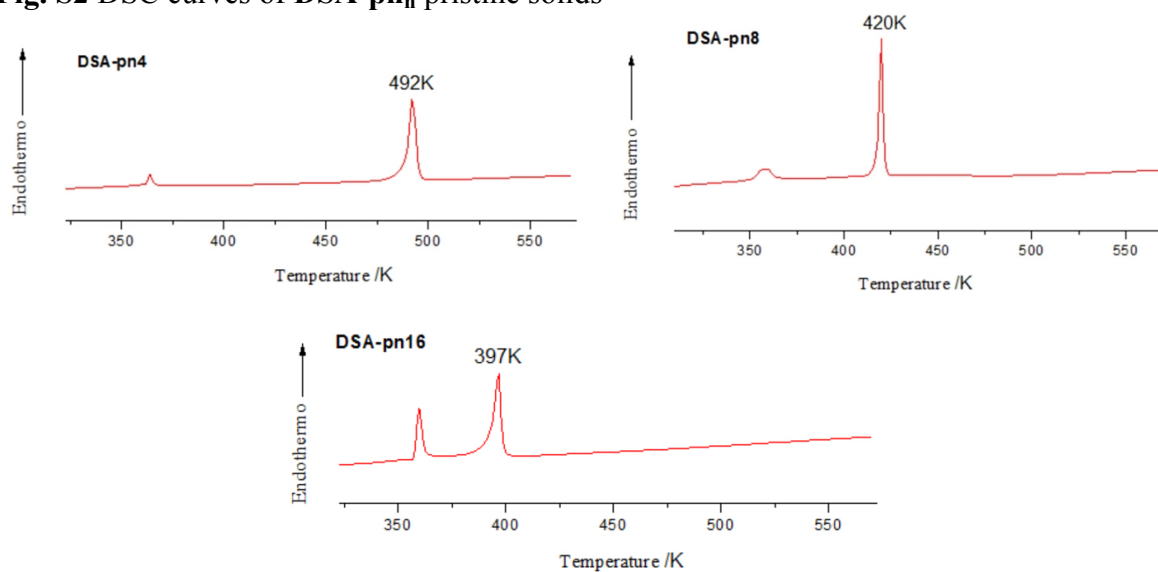

**Fig. S3** Powder X-ray diffraction patterns of **DSA-pn<sub>n</sub>** at room temperature and 478K for DSA-pn4, 428K for DSA-pn8, 398K for DSA-pn16

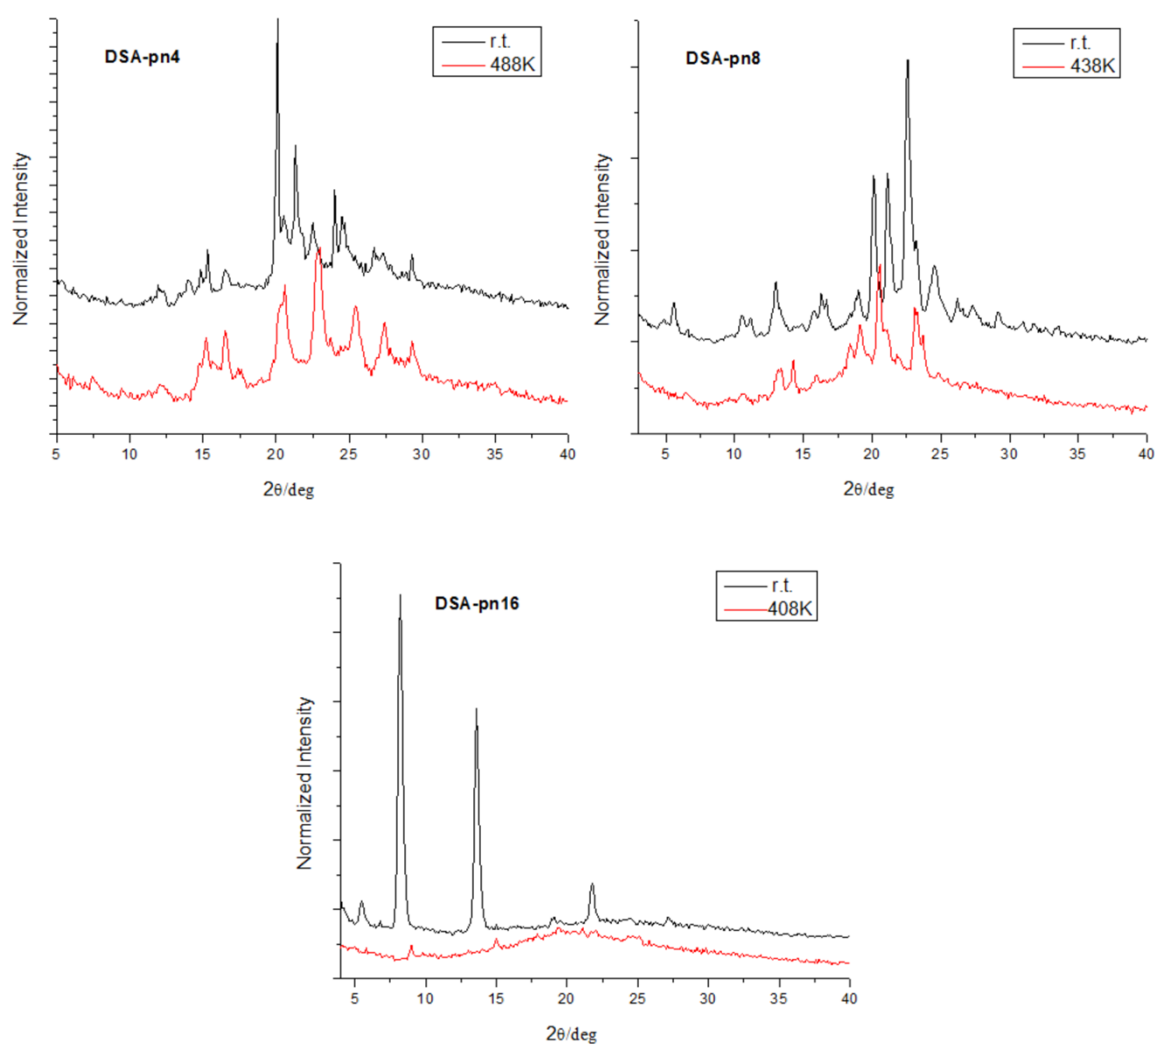

**Fig. S4** TGA curves for **DSA-pn<sub>n</sub>**

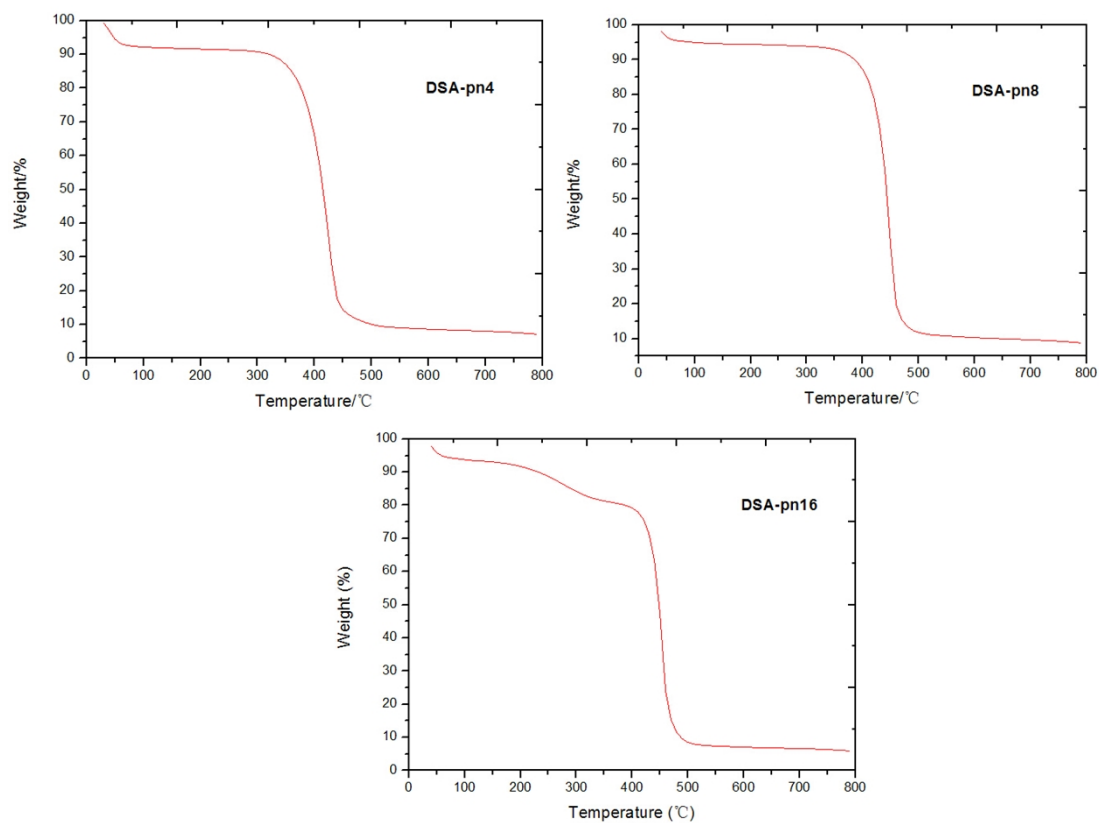

**Fig. S5** Molecular stacking modes of **DSA-pn4**, **DSA-pn8** and **DSA-pn16** in crystals

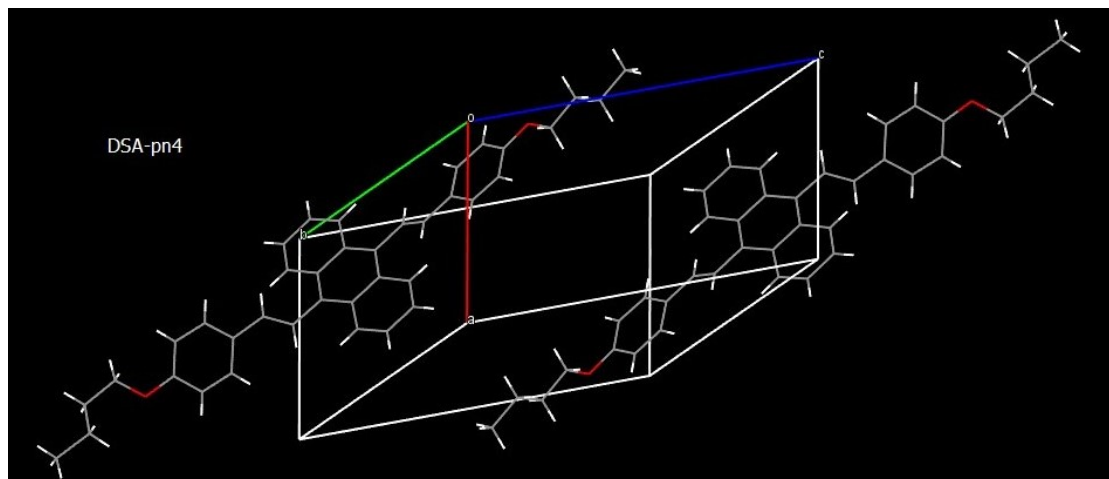

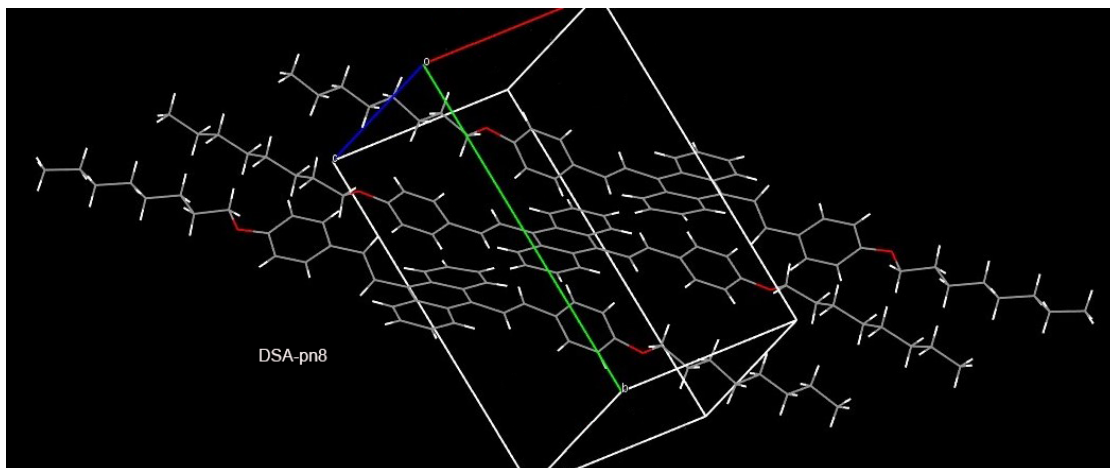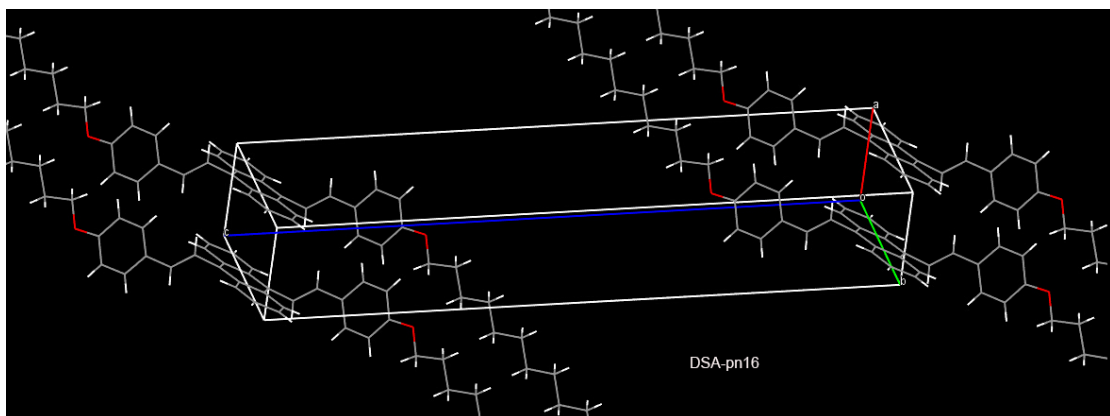



#### 4 <sup>1</sup>H NMR, <sup>13</sup>C NMR, HRMS spectra and HPLC

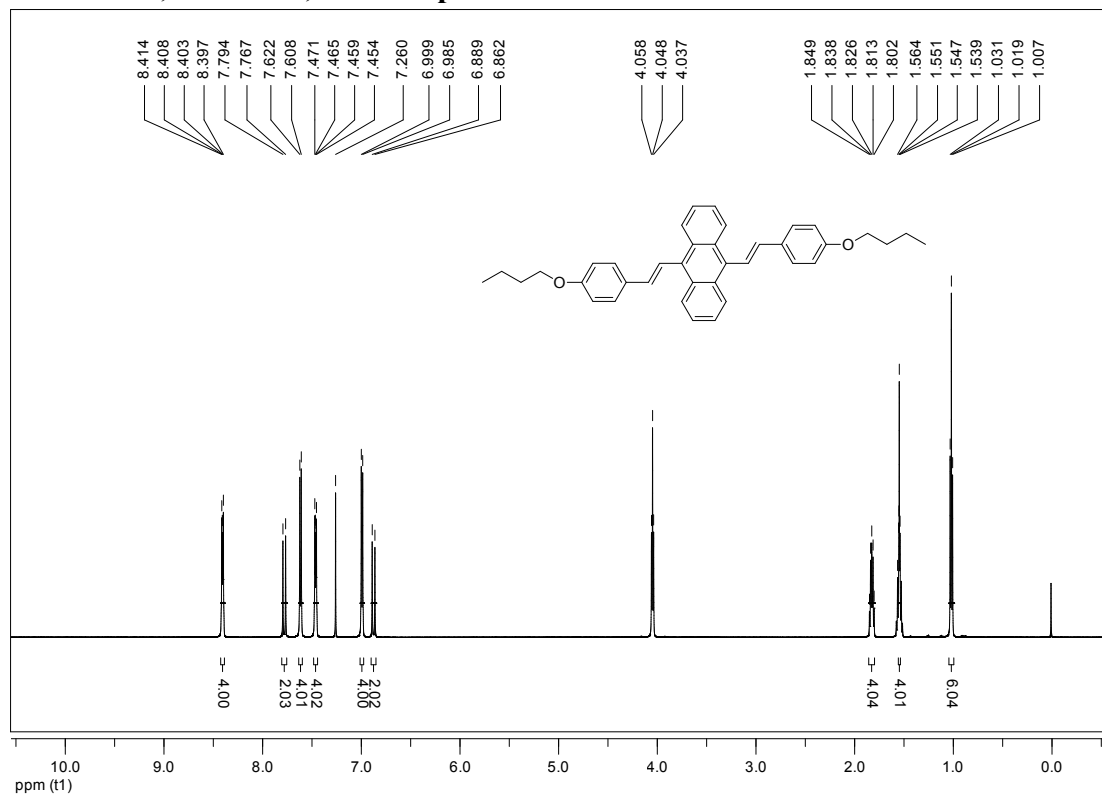

Fig. S6 <sup>1</sup>H NMR spectrum of DSA-pn4

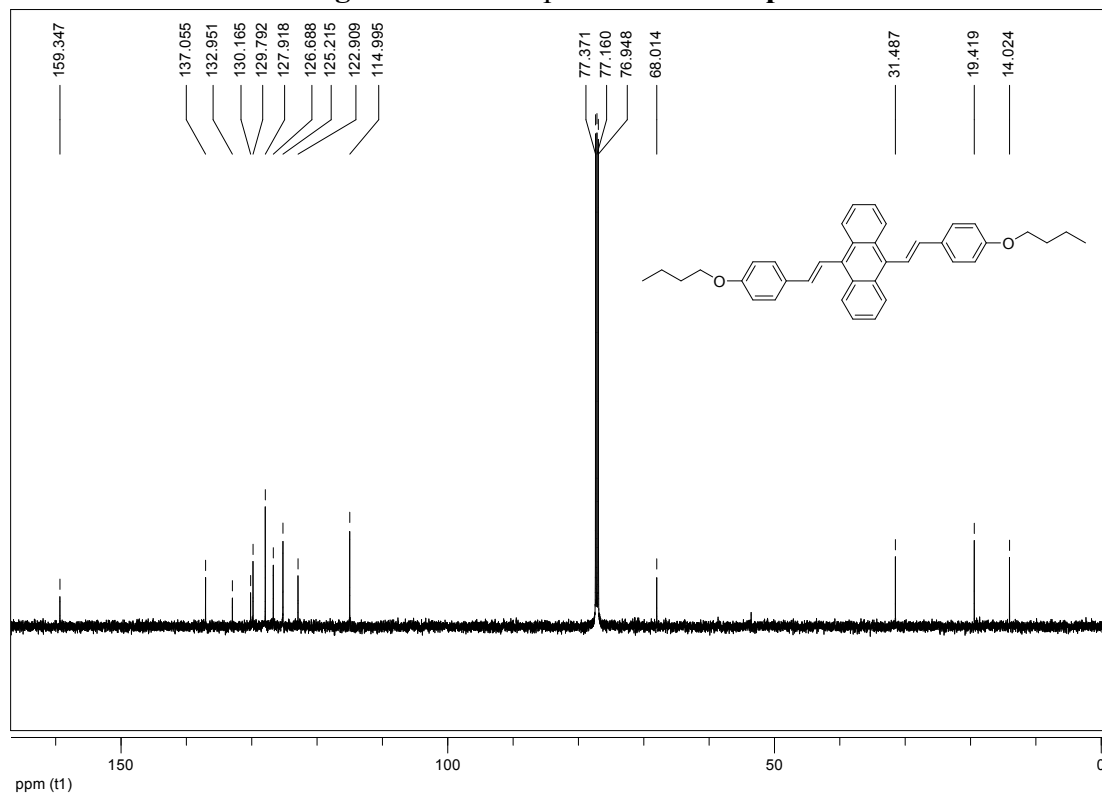

Fig. S7 <sup>13</sup>C NMR spectrum of DSA-pn4

**Acquisition Parameter**

|             |          |                       |           |                  |           |
|-------------|----------|-----------------------|-----------|------------------|-----------|
| Source Type | APCI     | Ion Polarity          | Positive  | Set Nebulizer    | 1.6 Bar   |
| Focus       | Active   | Set Capillary         | 4000 V    | Set Dry Heater   | 200 °C    |
| Scan Begin  | 350 m/z  | Set End Plate Offset  | -500 V    | Set Dry Gas      | 8.0 l/min |
| Scan End    | 2000 m/z | Set Collision Cell RF | 600.0 Vpp | Set Divert Valve | Source    |

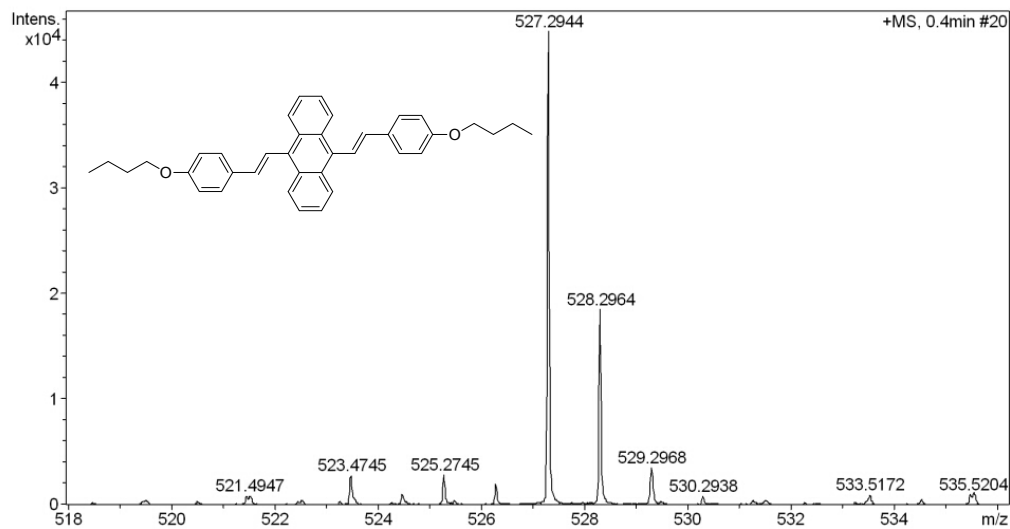**Fig. S8 HRMS spectrum of DSA-pn4**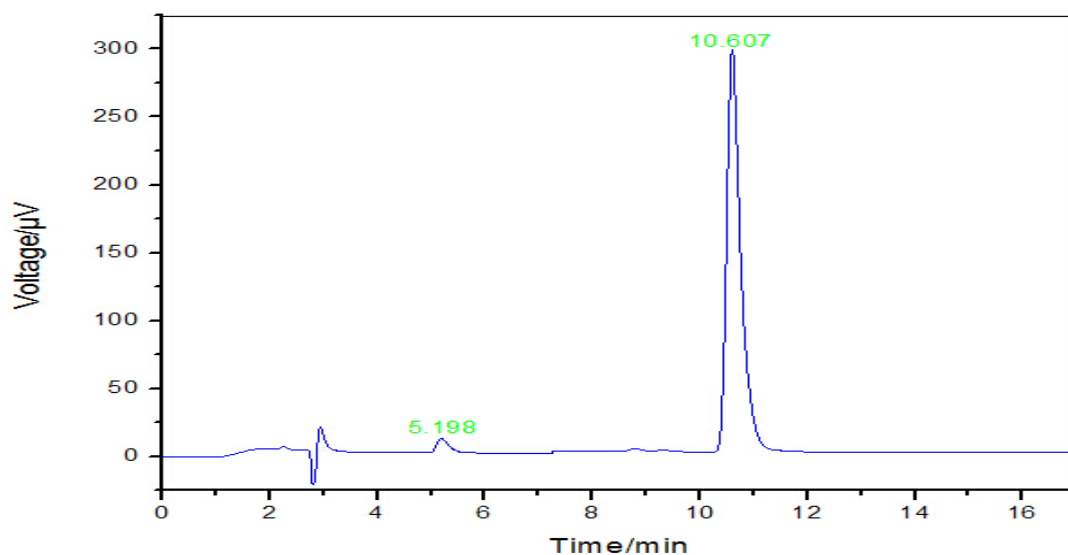

| Peak         | RT (min) | Height (µ V) | Area (µ V*Sec) | Area%  |
|--------------|----------|--------------|----------------|--------|
| 1            | 5.198    | 10.485       | 170825.857     | 3.05   |
| 2            | 10.607   | 295.756      | 5430554.000    | 96.95  |
| <b>Total</b> |          | 306.241      | 5601379.857    | 100.00 |

**Fig. S9 HPLC spectrum of DSA-pn4**

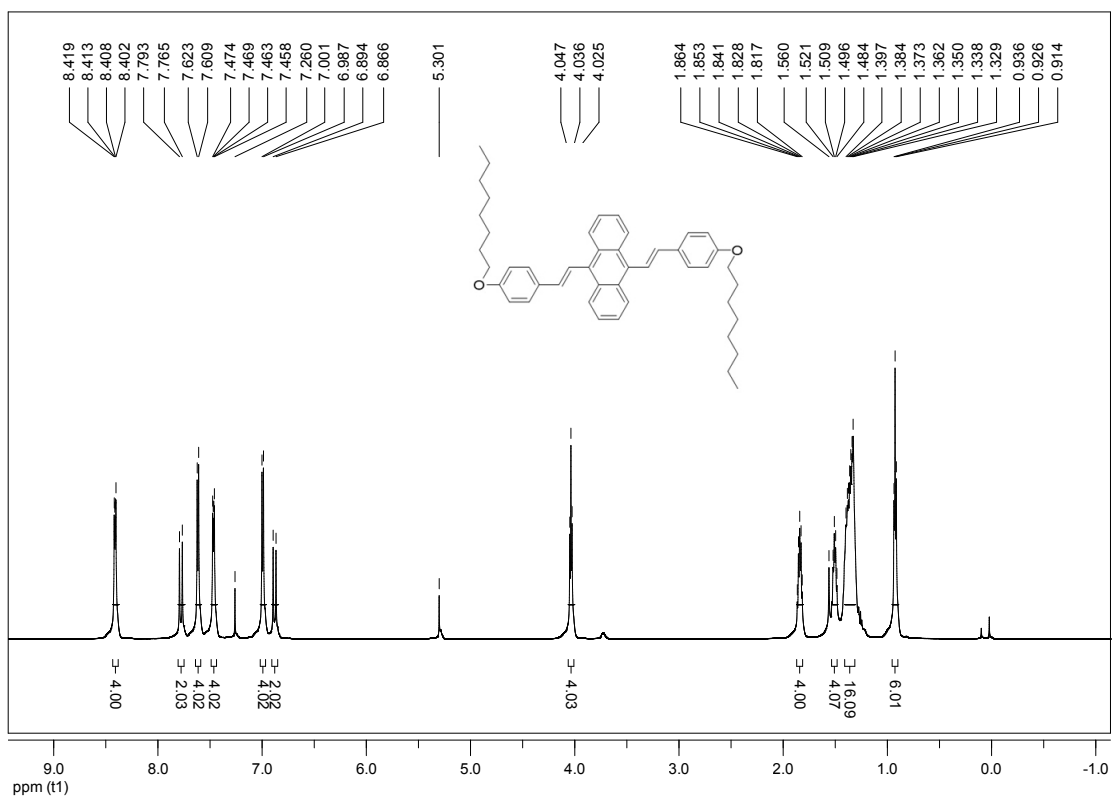

**Fig. S10**  $^1\text{H}$  NMR spectrum of DSA-pn8

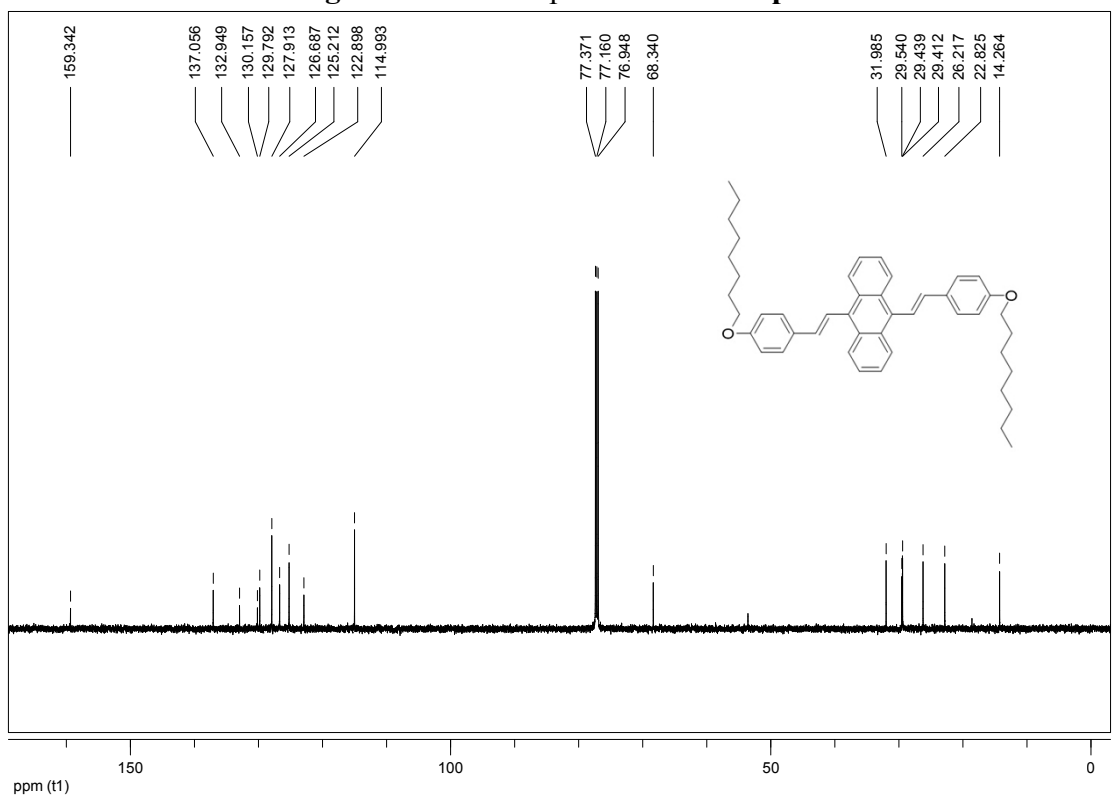

**Fig. S11**  $^{13}\text{C}$  NMR spectrum of DSA-pn8

**Acquisition Parameter**

|             |          |                       |           |                  |           |
|-------------|----------|-----------------------|-----------|------------------|-----------|
| Source Type | APCI     | Ion Polarity          | Positive  | Set Nebulizer    | 1.6 Bar   |
| Focus       | Active   | Set Capillary         | 4000 V    | Set Dry Heater   | 200 °C    |
| Scan Begin  | 350 m/z  | Set End Plate Offset  | -500 V    | Set Dry Gas      | 8.0 l/min |
| Scan End    | 2000 m/z | Set Collision Cell RF | 600.0 Vpp | Set Divert Valve | Source    |

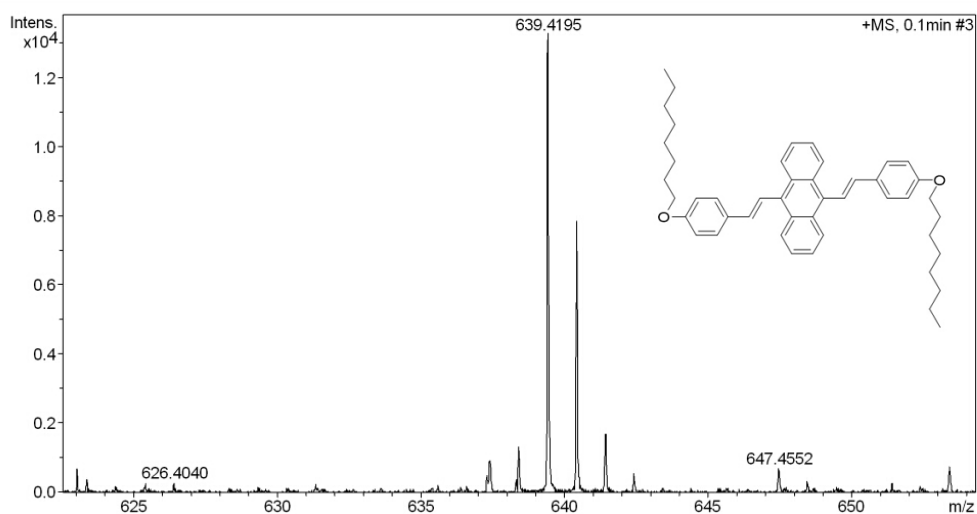**Fig. S12 HRMS spectrum of DSA-pn8**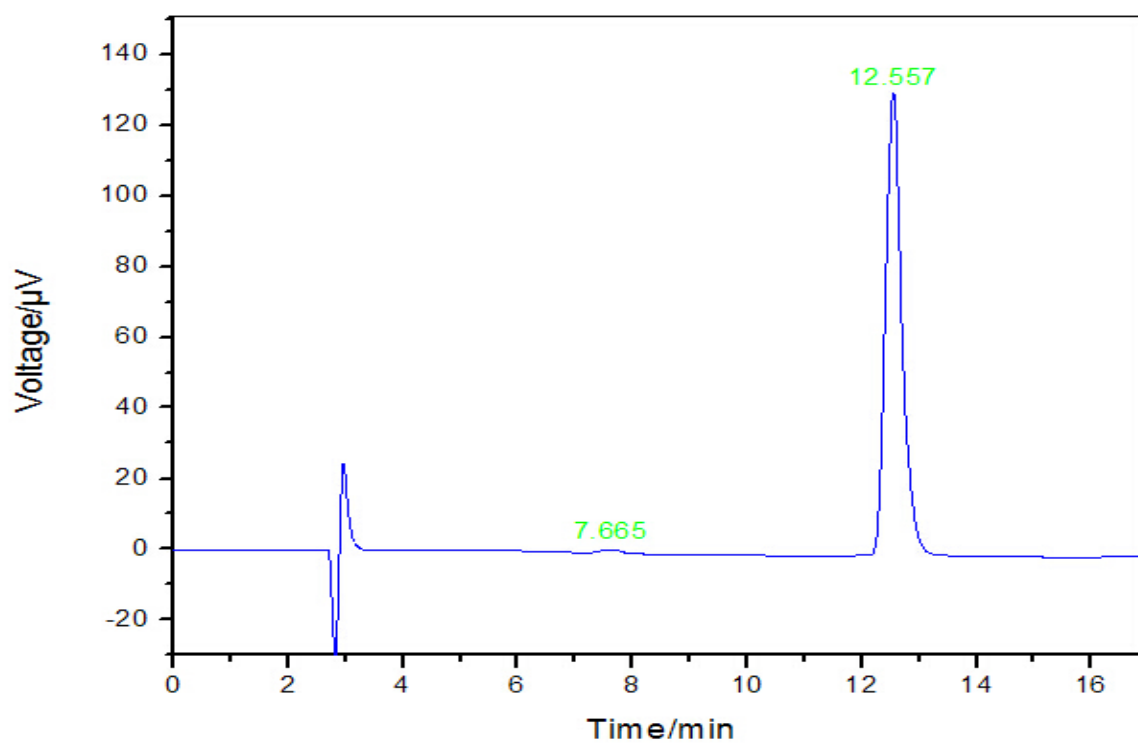

| Peak         | RT (min) | Height ( $\mu\text{V}$ ) | Area ( $\mu\text{V}\cdot\text{min}$ ) | Area%  |
|--------------|----------|--------------------------|---------------------------------------|--------|
| 1            | 7.665    | 1.120                    | 1607.200                              | 0.97   |
| 2            | 12.557   | 130.566                  | 2671387.250                           | 99.03  |
| <b>Total</b> |          | 131.686                  | 2672994.450                           | 100.00 |

**Fig. S13 HPLC spectrum of DSA-pn8**

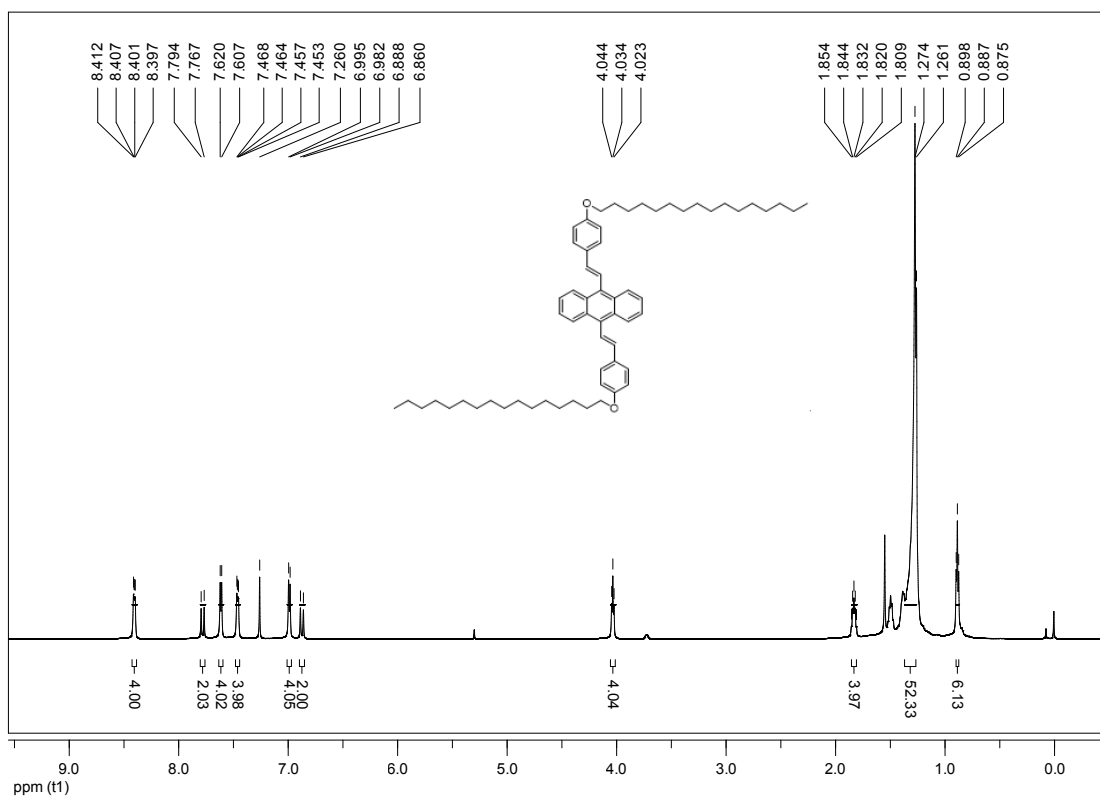

Fig. S14 <sup>1</sup>H NMR spectrum of DSA-pn16

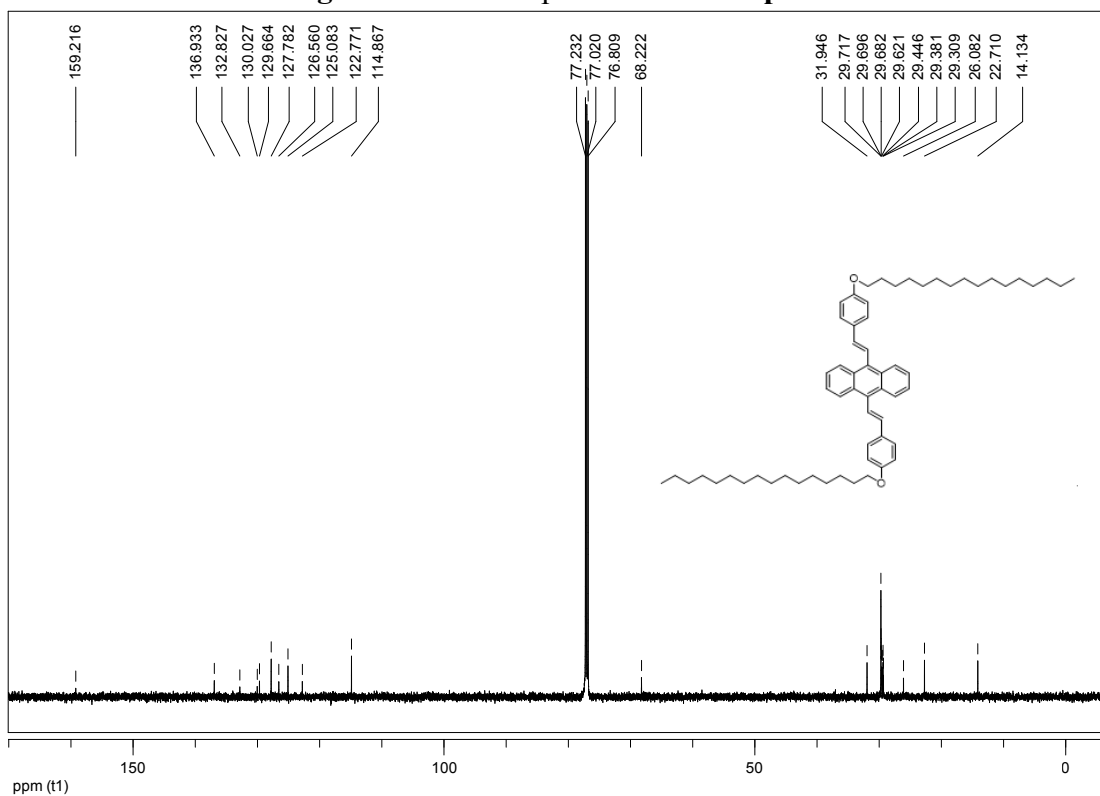

Fig. S15 <sup>13</sup>C NMR spectrum of DSA-pn16

**Acquisition Parameter**

|             |          |                       |           |                  |           |
|-------------|----------|-----------------------|-----------|------------------|-----------|
| Source Type | ESI      | Ion Polarity          | Positive  | Set Nebulizer    | 0.4 Bar   |
| Focus       | Active   | Set Capillary         | 4500 V    | Set Dry Heater   | 190 °C    |
| Scan Begin  | 300 m/z  | Set End Plate Offset  | -500 V    | Set Dry Gas      | 4.0 l/min |
| Scan End    | 1000 m/z | Set Collision Cell RF | 150.0 Vpp | Set Divert Valve | Waste     |

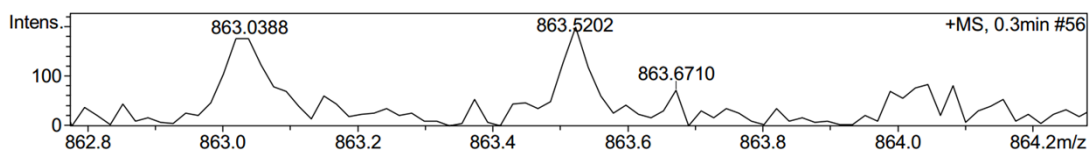

**Fig. S16** HRMS spectrum of **DSA-pn16**

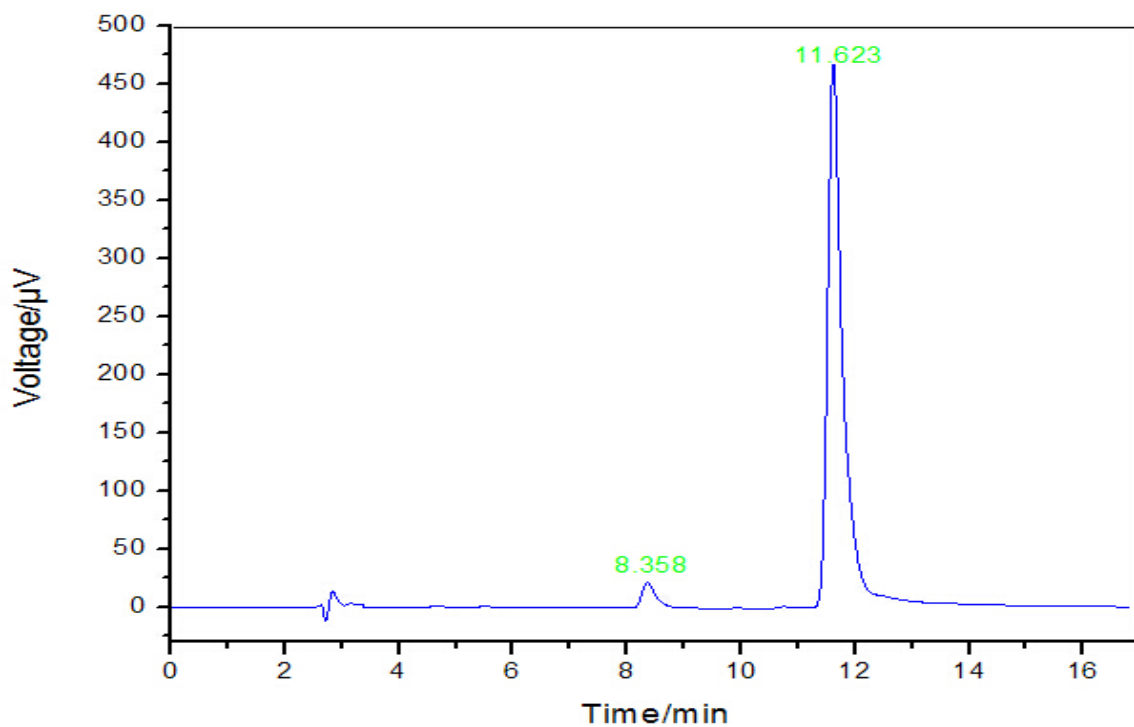

| Peak         | RT (min) | Height ( $\mu$ V ) | Area ( $\mu$ V*min ) | Area%  |
|--------------|----------|--------------------|----------------------|--------|
| 1            | 8.358    | 21.818             | 381709.938           | 3.89   |
| 2            | 11.623   | 468.182            | 9440492.000          | 96.11  |
| <b>Total</b> |          | 490.000            | 9822201.938          | 100.00 |

**Fig. S17** HPLC spectrum of **DSA-pn16**

## 5 Crystallographic data

**Table S2** Crystallographic data of **DSA-pn4**

|                                   |                                                                                                                                |
|-----------------------------------|--------------------------------------------------------------------------------------------------------------------------------|
| Empirical formula                 | C <sub>38</sub> H <sub>38</sub> O <sub>2</sub>                                                                                 |
| Formula weight                    | 526.68                                                                                                                         |
| Temperature                       | 292.1(4) K                                                                                                                     |
| Wavelength                        | 0.7107 Å                                                                                                                       |
| Crystal system, space group       | Triclinic, P -1                                                                                                                |
| Unit cell dimensions              | a = 9.6115(5) Å alpha = 110.013(6) deg.<br>b = 12.5777(8) Å beta = 107.490(5) deg.<br>c = 14.3804(10) Å gamma = 99.474(5) deg. |
| Volume                            | 1486.96(15) Å <sup>3</sup>                                                                                                     |
| Z, Calculated density             | 2, 1.150 Mg/m <sup>3</sup>                                                                                                     |
| Absorption coefficient            | 0.069 mm <sup>-1</sup>                                                                                                         |
| F (000)                           | 552                                                                                                                            |
| Crystal size                      | 0.3900 x 0.2100 x 0.0700 mm                                                                                                    |
| Theta range for data collection   | 3.00 to 26.37 deg.                                                                                                             |
| Limiting indices                  | -11 ≤ h ≤ 12, -15 ≤ k ≤ 15, -<br>17 ≤ l ≤ 17                                                                                   |
| Reflections collected / unique    | 12303 / 6064 [R (int) = 0.0251]                                                                                                |
| Completeness to theta = 26.37     | 99.7 %                                                                                                                         |
| Absorption correction             | Semi-empirical from equivalents                                                                                                |
| Max. and min. transmission        | 1.00000 and 0.64979                                                                                                            |
| Refinement method                 | Full-matrix least-squares on F <sup>2</sup>                                                                                    |
| Data / restraints / parameters    | 6064 / 5 / 364                                                                                                                 |
| Goodness-of-fit on F <sup>2</sup> | 1.040                                                                                                                          |
| Final R indices [I > 2 sigma (I)] | R <sub>1</sub> = 0.0674, wR <sup>2</sup> = 0.1743                                                                              |
| R indices (all data)              | R <sub>1</sub> = 0.1051, wR <sup>2</sup> = 0.2033                                                                              |
| Extinction coefficient            | 0.014(2)                                                                                                                       |
| Largest diff. peak and hole       | 0.429 and -0.311 e. Å <sup>-3</sup>                                                                                            |

**Table S3** Crystallographic data of **DSA-pn8**

|                             |                                                                                                                             |
|-----------------------------|-----------------------------------------------------------------------------------------------------------------------------|
| Empirical formula           | C <sub>46</sub> H <sub>54</sub> O <sub>2</sub>                                                                              |
| Formula weight              | 638.89                                                                                                                      |
| Temperature                 | 293(2) K                                                                                                                    |
| Wavelength                  | 1.54184 Å                                                                                                                   |
| Crystal system, space group | Triclinic, P -1                                                                                                             |
| Unit cell dimensions        | a = 9.0161(4) Å alpha = 78.313(4) deg.<br>b = 16.5141(8) Å beta = 79.260(4) deg.<br>c = 19.8096(9) Å gamma = 78.543(4) deg. |
| Volume                      | 2797.8(2) Å <sup>3</sup>                                                                                                    |
| Z, Calculated density       | 2, 1.138 Mg/m <sup>3</sup>                                                                                                  |
| Absorption coefficient      | 0.512 mm <sup>-1</sup>                                                                                                      |

|                                   |                                             |
|-----------------------------------|---------------------------------------------|
| F(000)                            | 1038                                        |
| Crystal size                      | 0.4800 x 0.1000 x 0.0800 mm                 |
| Theta range for data collection   | 3.29 to 67.08 deg.                          |
| Limiting indices                  | -9<=h<=10, -19<=k<=19, -21<=l<=23           |
| Reflections collected / unique    | 18454 / 9928 [R(int) = 0.0316]              |
| Completeness to theta = 67.08     | 99.3 %                                      |
| Absorption correction             | Semi-empirical from equivalents             |
| Max. and min. transmission        | 1.00000 and 0.58251                         |
| Refinement method                 | Full-matrix least-squares on F <sup>2</sup> |
| Data / restraints / parameters    | 9928 / 2 / 736                              |
| Goodness-of-fit on F <sup>2</sup> | 1.077                                       |
| Final R indices [I>2sigma(I)]     | R1 = 0.0714, wR2 = 0.2035                   |
| R indices (all data)              | R1 = 0.0944, wR2 = 0.2364                   |
| Extinction coefficient            | 0.0041(5)                                   |
| Largest diff. peak and hole       | 0.684 and -0.338 e.A <sup>-3</sup>          |

---

**Table S4** Crystallographic data of **DSA-pn16**

---

|                                   |                                                                                                                             |
|-----------------------------------|-----------------------------------------------------------------------------------------------------------------------------|
| Empirical formula                 | C <sub>62</sub> H <sub>86</sub> O <sub>2</sub>                                                                              |
| Formula weight                    | 863.30                                                                                                                      |
| Temperature                       | 100.00(10) K                                                                                                                |
| Wavelength                        | 0.7107 Å                                                                                                                    |
| Crystal system, space group       | Triclinic, P -1                                                                                                             |
| Unit cell dimensions              | a = 5.4009(2) Å alpha = 89.974(3) deg.<br>b = 7.3944(3) Å beta = 89.926(3) deg.<br>c = 31.9700(11) Å gamma = 88.837(3) deg. |
| Volume                            | 1276.50(8) Å <sup>3</sup>                                                                                                   |
| Z, Calculated density             | 2, 1.123 Mg/m <sup>3</sup>                                                                                                  |
| Absorption coefficient            | 0.065 mm <sup>-1</sup>                                                                                                      |
| F(000)                            | 474                                                                                                                         |
| Crystal size                      | 0.48 x 0.12 x 0.01 mm                                                                                                       |
| Theta range for data collection   | 3.19 to 26.37 deg.                                                                                                          |
| Limiting indices                  | -6<=h<=6, -9<=k<=9, -39<=l<=39                                                                                              |
|                                   | 1 / 5234 [R(int) = 0.0325]                                                                                                  |
| Completeness to theta = 26.37     | 99.8 %                                                                                                                      |
| Absorption correction             | Semi-empirical from equivalents                                                                                             |
| Max. and min. transmission        | 1.00000 and 0.55454                                                                                                         |
| Refinement method                 | Full-matrix least-squares on F <sup>2</sup>                                                                                 |
| Data / restraints / parameters    | 5234 / 0 / 290                                                                                                              |
| Goodness-of-fit on F <sup>2</sup> | 1.031                                                                                                                       |
| Final R indices [I>2sigma(I)]     | R1 = 0.0509, wR2 = 0.1275                                                                                                   |
| R indices (all data)              | R1 = 0.0714, wR2 = 0.1406                                                                                                   |
| Largest diff. peak and hole       | 0.221 and -0.238 e.A <sup>-3</sup>                                                                                          |

---
